# Supplementary material for: Zero carbon transitions: a systematic review of the research landscape and climate mitigation potential
Source: Frontiers journal article supplement (doi:10.3389/fenrg.2023.1268270), 2023-09-19
Supplement: Data_Sheet_2.docx [file Data_Sheet_2.docx]

**List of studies included in the systematic review following the PRISMA screening process**

Aghahosseini, A., Bogdanov, D., Ghorbani, N., & Breyer, C. (2018). Analysis of 100% renewable energy for Iran in 2030: integrating solar PV, wind energy and storage. *International Journal of Environmental Science and Technology*, *15*(1), 17–36. https://doi.org/10.1007/s13762-017-1373-4

Alcalde, J., Smith, P., Haszeldine, R. S., & Bond, C. E. (2018). The potential for implementation of Negative Emission Technologies in Scotland. *International Journal of Greenhouse Gas Control*, *76*, 85–91. https://doi.org/10.1016/j.ijggc.2018.06.021

Allen, C., Oldfield, P., Teh, S. H., Wiedmann, T., Langdon, S., Yu, M., & Yang, J. (2022). Modelling ambitious climate mitigation pathways for Australia’s built environment. *Sustainable Cities and Society*, *77*. https://doi.org/10.1016/j.scs.2021.103554

Bamisile, O., Wang, X., Adun, H., Joseph Ejiyi, C., Obiora, S., Huang, Q., & Hu, W. (2022). A 2030 and 2050 feasible/sustainable decarbonization perusal for China’s Sichuan Province: A deep carbon neutrality analysis and EnergyPLAN. *Energy Conversion and Management*, *261*. https://doi.org/10.1016/j.enconman.2022.115605

Barthelmie, R. J., & Pryor, S. C. (2021). Climate change mitigation potential of wind energy. *Climate*, *9*(9). https://doi.org/10.3390/cli9090136

Bataille, C., Waisman, H., Briand, Y., Svensson, J., Vogt-Schilb, A., Jaramillo, M., Delgado, R., Arguello, R., Clarke, L., Wild, T., Lallana, F., Bravo, G., Nadal, G., Le Treut, G., Godinez, G., Quiros-Tortos, J., Pereira, E., Howells, M., Buira, D., … Imperio, M. (2020). Net-zero deep decarbonization pathways in Latin America: Challenges and opportunities. *Energy Strategy Reviews*, *30*. https://doi.org/10.1016/j.esr.2020.100510

Becattini, V., Gabrielli, P., & Mazzotti, M. (2021). Role of carbon capture, storage, and utilization to enable a Net-Zero-CO2-emissions aviation sector. *Industrial and Engineering Chemistry Research*, *60*(18), 6848–6862. https://doi.org/10.1021/acs.iecr.0c05392

Bradfer-Lawrence, T., Finch, T., Bradbury, R. B., Buchanan, G. M., Midgley, A., & Field, R. H. (2021). The potential contribution of terrestrial nature-based solutions to a national ‘net zero’ climate target. *Journal of Applied Ecology*, *58*(11), 2349–2360. https://doi.org/10.1111/1365-2664.14003

Brand, C., Anable, J., Ketsopoulou, I., & Watson, J. (2020). Road to zero or road to nowhere? Disrupting transport and energy in a zero carbon world. *Energy Policy*, *139*. https://doi.org/10.1016/j.enpol.2020.111334

Breyer, C., Khalili, S., & Bogdanov, D. (2019). Solar photovoltaic capacity demand for a sustainable transport sector to fulfil the Paris Agreement by 2050. *Progress in Photovoltaics: Research and Applications*, *27*(11), 978–989. https://doi.org/10.1002/pip.3114

Bu, C., Cui, X., Li, R., Li, J., Zhang, Y., Wang, C., & Cai, W. (2021). Achieving net-zero emissions in China’s passenger transport sector through regionally tailored mitigation strategies. *Applied Energy*, *284*. https://doi.org/10.1016/j.apenergy.2020.116265

Cao, S., Klein, K., Herkel, S., & Sirén, K. (2017). Approaches to enhance the energy performance of a zero-energy building integrated with a commercial-scale hydrogen fueled zero-energy vehicle under Finnish and German conditions. *Energy Conversion and Management*, *142*, 153–175. https://doi.org/10.1016/j.enconman.2017.03.037

Centre for Research into Energy Demand Solutions. (2021). *The role of energy demand reduction in achieving net-zero in the UK*.

Chunark, P., & Limmeechokchai, B. (2018). Thailand Energy System Transition to Keep Warming Below 1.5 Degrees. *Carbon Management*, *9*(5), 515–531. https://doi.org/10.1080/17583004.2018.1536169

Cintas, O., Berndes, G., Hansson, J., Poudel, B. C., Bergh, J., Börjesson, P., Egnell, G., Lundmark, T., & Nordin, A. (2017). The potential role of forest management in Swedish scenarios towards climate neutrality by mid century. *Forest Ecology and Management*, *383*, 73–84. https://doi.org/10.1016/j.foreco.2016.07.015

Committee on Climate Change. (2018a). *Hydrogen in a low-carbon economy Committee on Climate Change*.

Committee on Climate Change. (2018b). *Reducing UK emissions: 2018 Progress Report to Parliament*.

Committee on Climate Change. (2019a). *Net Zero: The UK’s contribution to stopping global warming*.

Committee on Climate Change. (2019b). *Net Zero Technical Report*.

Committee on Climate Change. (2020). *The Sixth Carbon Budget: The UK’s path to Net Zero*.

Cong, R., Fujiyama, A., & Matsumoto, T. (2022). Carbon sink quantification aids for achieving the zero-emission goal: A case study in Japan. *Energy Reports*, *8*, 8–17. https://doi.org/10.1016/j.egyr.2022.06.102

Cossutta, M., Foo, D. C. Y., & Tan, R. R. (2021). Carbon emission spinch analysis (CEPA) for planning the decarbonization of the UK power sector. *Sustainable Production and Consumption*, *25*, 259–270. https://doi.org/10.1016/j.spc.2020.08.013

Costa, C., Wollenberg, E., Benitez, M., Newman, R., Gardner, N., Bellone, F., Costa Jr., C., Wollenberg, E., Benitez, M., Newman, R., Gardner, N., Bellone, F., Costa, C., Wollenberg, E., Benitez, M., Newman, R., Gardner, N., & Bellone, F. (2022). Roadmap for achieving net-zero emissions in global food systems by 2050. *Scientific Reports*, *12*(1). https://doi.org/10.1038/s41598-022-18601-1

Costa, L., Moreau, V., Thurm, B., Yu, W., Clora, F., Baudry, G., Warmuth, H., Hezel, B., Seydewitz, T., Ranković, A., Kelly, G., & Kropp, J. P. (2021). The decarbonisation of Europe powered by lifestyle changes. *Environmental Research Letters*, *16*(4). https://doi.org/10.1088/1748-9326/abe890

Department for Business Energy and Industrial Strategy. (2017). *The Clean Growth Strategy*.

Department for Business Energy and Industrial Strategy. (2019). *Updated energy and emissions projections 2019*.

Dominković, D. F., Bačeković, I., Ćosić, B., Krajačić, G., Pukšec, T., Duić, N., & Markovska, N. (2016). Zero carbon energy system of South East Europe in 2050. *Applied Energy*, *184*, 1517–1528. https://doi.org/10.1016/j.apenergy.2016.03.046

Dooley, K., Nicholls, Z., & Meinshausen, M. (2022). Carbon removals from nature restoration are no substitute for steep emission reductions. *One Earth*, *5*(7), 812–824. https://doi.org/10.1016/j.oneear.2022.06.002

Dray, L., Schäfer, A. W., Grobler, C., Falter, C., Allroggen, F., Stettler, M. E. J., & Barrett, S. R. H. (2022). Cost and emissions pathways towards net-zero climate impacts in aviation. *Nature Climate Change*, *12*(10), 956–962. https://doi.org/10.1038/s41558-022-01485-4

Fazeli, R., Beck, F. J., & Stocks, M. (2022). Recognizing the role of uncertainties in the transition to renewable hydrogen. *International Journal of Hydrogen Energy*, *47*(65), 27896–27910. https://doi.org/10.1016/j.ijhydene.2022.06.122

Gaeta, M., Businge, C. N., & Gelmini, A. (2021). Achieving net zero emissions in italy by 2050: Challenges and opportunities. *Energies*, *15*(1). https://doi.org/10.3390/en15010046

Galván, A., Haas, J., Moreno-Leiva, S., Osorio-Aravena, J. C., Nowak, W., Palma-Benke, R., Breyer, C., Galvan, A., Haas, J., Moreno-Leiva, S., Osorio-Aravena, J. C., Nowak, W., Palma-Benke, R., & Breyer, C. (2022). Exporting sunshine: Planning South America’s electricity transition with green hydrogen. *Applied Energy*, *325*. https://doi.org/10.1016/j.apenergy.2022.119569

Garvey, A., Norman, J. B., & Barrett, J. (2022). Technology and material efficiency scenarios for net zero emissions in the UK steel sector. *Journal of Cleaner Production*, *333*. https://doi.org/10.1016/j.jclepro.2021.130216

Garvey, A., Norman, J. B., Owen, A., & Barrett, J. (2021). Towards net zero nutrition: The contribution of demand-side change to mitigating UK food emissions. *Journal of Cleaner Production*, *290*. https://doi.org/10.1016/j.jclepro.2020.125672

Gi, K., Sano, F., Akimoto, K., Hiwatari, R., & Tobita, K. (2020). Potential contribution of fusion power generation to low-carbon development under the Paris Agreement and associated uncertainties. *ENERGY STRATEGY REVIEWS*, *27*. https://doi.org/10.1016/j.esr.2019.100432

Green Alliance. (2019). *Cutting the climate impact of land use, What role can land use play in climate change mitigation?*

Gulagi, A., Bogdanov, D., & Breyer, C. (2018). The role of storage technologies in energy transition pathways towards achieving a fully sustainable energy system for India. *Journal of Energy Storage*, *17*, 525–539. https://doi.org/10.1016/j.est.2017.11.012

Gulagi, A., Choudhary, P., Bogdanov, D., & Breyer, C. (2017). Electricity system based on 100% renewable energy for India and SAARC. *PLoS ONE*, *12*(7). https://doi.org/10.1371/journal.pone.0180611

Gurieff, N., Moghtaderi, B., Daiyan, R., & Amal, R. (2021). Gas transition: Renewable hydrogen’s future in eastern Australia’s energy networks. *Energies*, *14*(13). https://doi.org/10.3390/en14133968

Handayani, K., Anugrah, P., Goembira, F., Overland, I., Suryadi, B., & Swandaru, A. (2022). Moving beyond the NDCs: ASEAN pathways to a net-zero emissions power sector in 2050. *Applied Energy*, *311*. https://doi.org/10.1016/j.apenergy.2022.118580

Hannula, I., & Reiner, D. M. (2019). Near-Term Potential of Biofuels, Electrofuels, and Battery Electric Vehicles in Decarbonizing Road Transport. *Joule*, *3*(10), 2390–2402. https://doi.org/10.1016/j.joule.2019.08.013

Heo, S., Ko, J., Kim, S., Jeong, C., Hwangbo, S., & Yoo, C. (2022). Explainable AI-driven net-zero carbon roadmap for petrochemical industry considering stochastic scenarios of remotely sensed offshore wind energy. *Journal of Cleaner Production*, *379*. https://doi.org/10.1016/j.jclepro.2022.134793

Hong, S., Bradshaw, C. J. A., & Brook, B. W. (2015). Global zero-carbon energy pathways using viable mixes of nuclear and renewables. *Applied Energy*, *143*, 451–459. https://doi.org/10.1016/j.apenergy.2015.01.006

House of Commons Library. (2019). *Net zero in the UK*.

Hu, M., & Qiu, Y. (2019). A comparison of building energy codes and policies in the USA, Germany, and China: progress toward the net-zero building goal in three countries. *Clean Technologies and Environmental Policy*, *21*(2), 291–305. https://doi.org/10.1007/s10098-018-1636-x

Inal, O. B., Zincir, B., & Deniz, C. (2022). Investigation on the decarbonization of shipping: An approach to hydrogen and ammonia. *International Journal of Hydrogen Energy*, *47*(45), 19888–19900. https://doi.org/10.1016/j.ijhydene.2022.01.189

Iqbal, M. I., Himmler, R., & Gheewala, S. H. (2017). Potential life cycle energy savings through a transition from typical to energy plus households: A case study from Thailand. *Energy and Buildings*, *134*, 295–305. https://doi.org/10.1016/j.enbuild.2016.11.002

Ji, L., Wu, Y., Sun, L., Zhao, X., Wang, X., Xie, Y., Guo, J., & Huang, G. (2022). Solar photovoltaics can help China fulfill a net-zero electricity system by 2050 even facing climate change risks. *Resources, Conservation and Recycling*, *186*. https://doi.org/10.1016/j.resconrec.2022.106596

Johansson, V., Lehtveer, M., & Göransson, L. (2019). Biomass in the electricity system: A complement to variable renewables or a source of negative emissions? *Energy*, *168*, 532–541. https://doi.org/10.1016/j.energy.2018.11.112

Kanugrahan, S. P., Hakam, D. F., & Nugraha, H. (2022). Techno-Economic Analysis of Indonesia Power Generation Expansion to Achieve Economic Sustainability and Net Zero Carbon 2050. *Sustainability (Switzerland)*, *14*(15). https://doi.org/10.3390/su14159038

Kato, E., & Kurosawa, A. (2021). Role of negative emissions technologies (NETs) and innovative technologies in transition of Japan’s energy systems toward net-zero CO2 emissions. *Sustainability Science*, *16*(2), 463–475. https://doi.org/10.1007/s11625-021-00908-z

Khatri-Chhetri, A., Costa Junior, C., & Wollenberg, E. (2022). Greenhouse gas mitigation co-benefits across the global agricultural development programs. *Global Environmental Change*, *76*. https://doi.org/10.1016/j.gloenvcha.2022.102586

Koide, R., Kojima, S., Nansai, K., Lettenmeier, M., Asakawa, K., Liu, C., & Murakami, S. (2021). Exploring carbon footprint reduction pathways through urban lifestyle changes: A practical approach applied to Japanese cities. *Environmental Research Letters*, *16*(8). https://doi.org/10.1088/1748-9326/ac0e64

Li, X., Arbabi, H., Bennett, G., Oreszczyn, T., & Densley Tingley, D. (2022). Net zero by 2050: Investigating carbon-budget compliant retrofit measures for the English housing stock. *Renewable and Sustainable Energy Reviews*, *161*. https://doi.org/10.1016/j.rser.2022.112384

Logan, K. G., Nelson, J. D., & Hastings, A. (2020a). Electric and hydrogen buses: Shifting from conventionally fuelled cars in the UK. *Transportation Research Part D: Transport and Environment*, *85*. https://doi.org/10.1016/j.trd.2020.102350

Logan, K. G., Nelson, J. D., McLellan, B. C., & Hastings, A. (2020b). Electric and hydrogen rail: Potential contribution to net zero in the UK. *Transportation Research Part D: Transport and Environment*, *87*. https://doi.org/10.1016/j.trd.2020.102523

Logan, K. G., Nelson, J. D., & Hastings, A. (2022). Low emission vehicle integration: Will National Grid electricity generation mix meet UK net zero? *Proceedings of the Institution of Mechanical Engineers, Part A: Journal of Power and Energy*, *236*(1), 159–175. https://doi.org/10.1177/09576509211015472

Lu, X., Cao, L., Wang, H., Peng, W., Xing, J., Wang, S., Cai, S., Shen, B., Yang, Q., Nielsen, C. P., & McElroy, M. B. (2019). Gasification of coal and biomass as a net carbon-negative power source for environment-friendly electricity generation in China. *Proceedings of the National Academy of Sciences of the United States of America*, *116*(17), 8206–8213. https://doi.org/10.1073/pnas.1812239116

Lugovoy, O., Gao, S., Gao, J., & Jiang, K. (2021a). Feasibility study of China’s electric power sector transition to zero emissions by 2050. *Energy Economics*, *96*. https://doi.org/10.1016/j.eneco.2021.105176

Lugovoy, O., Jyothiprakash, V., Chatterjee, S., Sharma, S., Mukherjee, A., Das, A., Thakur, B., Some, S., Dinesha, D. L., Das, N., Bosu, P., Padhi, L., Roy, B., Debsarkar, A., Patil, B., Dasgupta, S., & Roy, J. (2021b). Towards a zero-carbon electricity system for india in 2050: Ideea model-based scenarios integrating wind and solar complementarity and geospatial endowments. *Energies*, *14*(21). https://doi.org/10.3390/en14217063

Manjong, N. B., Oyewo, A. S., & Breyer, C. (2021). Setting the Pace for a Sustainable Energy Transition in Central Africa: The Case of Cameroon. *IEEE Access*, *9*, 145435–145458. https://doi.org/10.1109/ACCESS.2021.3121000

Martes, L., & Köhl, M. (2022). Improving the Contribution of Forests to Carbon Neutrality under Different Policies—A Case Study from the Hamburg Metropolitan Area. *Sustainability (Switzerland)*, *14*(4). https://doi.org/10.3390/su14042088

Martínez-Gordón, R., Sánchez-Diéguez, M., Fattahi, A., Morales-España, G., Sijm, J., & Faaij, A. (2022). Modelling a highly decarbonised North Sea energy system in 2050: A multinational approach. *Advances in Applied Energy*, *5*. https://doi.org/10.1016/j.adapen.2021.100080

Matthews, H. D., Zickfeld, K., Dickau, M., MacIsaac, A. J., Mathesius, S., Nzotungicimpaye, C.-M. M., & Luers, A. (2022). Temporary nature-based carbon removal can lower peak warming in a well-below 2 °C scenario. *Communications Earth and Environment*, *3*(1). https://doi.org/10.1038/s43247-022-00391-z

National Grid. (2021). *Future Energy Scenarios*.

Ohene, E., Hsu, S.-C., & Chan, A. P. C. (2022). Feasibility and retrofit guidelines towards net-zero energy buildings in tropical climates: A case of Ghana. *Energy and Buildings*, *269*. https://doi.org/10.1016/j.enbuild.2022.112252

Oshiro, K., Masui, T., & Kainuma, M. (2018). Transformation of Japan’s energy system to attain net-zero emission by 2050. *Carbon Management*, *9*(5), 493–501. https://doi.org/10.1080/17583004.2017.1396842

Ozawa, A., Tsani, T., & Kudoh, Y. (2022). Japan’s pathways to achieve carbon neutrality by 2050 – Scenario analysis using an energy modeling methodology. *Renewable and Sustainable Energy Reviews*, *169*. https://doi.org/10.1016/j.rser.2022.112943

Pilpola, S., Arabzadeh, V., Mikkola, J., & Lund, P. D. (2019). Analyzing National and Local Pathways to Carbon-Neutrality from Technology, Emissions, and Resilience PerspectivesCase of Finland. *Energies*, *12*(5). https://doi.org/10.3390/en12050949

Pradhan, B. B., Chaichaloempreecha, A., Chunark, P., Rajbhandari, S., Pita, P., & Limmeechokchai, B. (2022). Energy system transformation for attainability of net zero emissions in Thailand. *International Journal of Sustainable Energy Planning and Management*, *35*, 27–44. https://doi.org/10.54337/ijsepm.7116

Price, J., Keppo, I., & Dodds, P. E. (2023). The role of new nuclear power in the UK’s net-zero emissions energy system. *ENERGY*, *262*. https://doi.org/10.1016/j.energy.2022.125450

Ren, M., Ma, T., Fang, C., Liu, X. R., Guo, C. Y., Zhang, S. L., Zhou, Z. Q., Zhu, Y. L., Dai, H. C., & Huang, C. (2023). Negative emission technology is key to decarbonizing China’s cement industry. *APPLIED ENERGY*, *329*. https://doi.org/10.1016/j.apenergy.2022.120254

Roach, P. E., & Ugursal, V. I. (2021). Development and techno-economic evaluation of pathways to new construction net-zero energy houses in nova scotia, canada. *Transactions of the Canadian Society for Mechanical Engineering*, *45*(2), 221–232. https://doi.org/10.1139/tcsme-2019-0247

Rogelj, J., Luderer, G., Pietzcker, R. C., Kriegler, E., Schaeffer, M., Krey, V., & Riahi, K. (2015). Energy system transformations for limiting end-of-century warming to below 1.5 degrees C. *NATURE CLIMATE CHANGE*, *5*(6), 519-+. https://doi.org/10.1038/nclimate2572

Scheepers, M., Palacios, S. G., Jegu, E., Nogueira, L. P., Rutten, L., van Stralen, J., Smekens, K., West, K., & van der Zwaan, B. (2022). Towards a climate-neutral energy system in the Netherlands. *Renewable and Sustainable Energy Reviews*, *158*. https://doi.org/10.1016/j.rser.2022.112097

Schreyer, F., Luderer, G., Rodrigues, R., Pietzcker, R. C., Baumstark, L., Sugiyama, M., Brecha, R. J., & Ueckerdt, F. (2020). Common but differentiated leadership: Strategies and challenges for carbon neutrality by 2050 across industrialized economies. *Environmental Research Letters*, *15*(11). https://doi.org/10.1088/1748-9326/abb852

Shimoda, Y., Sugiyama, M., Nishimoto, R., & Momonoki, T. (2021). Evaluating decarbonization scenarios and energy management requirement for the residential sector in Japan through bottom-up simulations of energy end-use demand in 2050. *Applied Energy*, *303*. https://doi.org/10.1016/j.apenergy.2021.117510

Simon, S., Xiao, M. Z., Harpprecht, C., Sasanpour, S., Gardian, H., & Pregger, T. (2022). A Pathway for the German Energy Sector Compatible with a 1.5 °C Carbon Budget. *Sustainability (Switzerland)*, *14*(2). https://doi.org/10.3390/su14021025

Slorach, P. C., & Stamford, L. (2021). Net zero in the heating sector: Technological options and environmental sustainability from now to 2050. *Energy Conversion and Management*, *230*. https://doi.org/10.1016/j.enconman.2021.113838

Solomon, A. A., Bogdanov, D., & Breyer, C. (2018). Solar driven net zero emission electricity supply with negligible carbon cost: Israel as a case study for Sun Belt countries. *Energy*, *155*, 87–104. https://doi.org/10.1016/j.energy.2018.05.014

Todeschini, G., Coles, D., Lewis, M., Popov, I., Angeloudis, A., Fairley, I., Johnson, F., Williams, A. J., Robins, P., & Masters, I. (2022). Medium-term variability of the UK’s combined tidal energy resource for a net-zero carbon grid. *Energy*, *238*. https://doi.org/10.1016/j.energy.2021.121990

Tokimatsu, K., Yasuoka, R., & Nishio, M. (2017). Global zero emissions scenarios: The role of biomass energy with carbon capture and storage by forested land use. *Applied Energy*, *185*, 1899–1906. https://doi.org/10.1016/j.apenergy.2015.11.077

Tsiropoulos, I., Siskos, P., De Vita, A., Tasios, N., & Capros, P. (2022). Assessing the implications of bioenergy deployment in the EU in deep decarbonization and climate-neutrality context: a scenario-based analysis. *BIOFUELS BIOPRODUCTS & BIOREFINING-BIOFPR*, *16*(5), 1196–1213. https://doi.org/10.1002/bbb.2366

UK Energy Research Centre. (2021). *Review of Energy Policy 2021*.

Valente, A., Iribarren, D., & Dufour, J. (2020). Prospective carbon footprint comparison of hydrogen options. *Science of the Total Environment*, *728*. https://doi.org/10.1016/j.scitotenv.2020.138212

Vats, G., & Mathur, R. (2022). A net-zero emissions energy system in India by 2050: An exploration. *Journal of Cleaner Production*, *352*. https://doi.org/10.1016/j.jclepro.2022.131417

Wang, X., Bamisile, O., Chen, S., Xu, X., Luo, S., Huang, Q., & Hu, W. (2022). Decarbonization of China’s electricity systems with hydropower penetration and pumped-hydro storage: Comparing the policies with a techno-economic analysis. *Renewable Energy*, *196*, 65–83. https://doi.org/10.1016/j.renene.2022.06.080

Watari, T., Cao, Z., Hata, S., & Nansai, K. (2022). Efficient use of cement and concrete to reduce reliance on supply-side technologies for net-zero emissions. *Nature Communications*, *13*(1). https://doi.org/10.1038/s41467-022-31806-2

Wiest, F., Gamarra Scavone, M. G., Newell, M. T., Otto, I. M., & Ringsmuth, A. K. (2022). Scaling Up Ecovillagers’ Lifestyles Can Help to Decarbonise Europe. *Sustainability (Switzerland)*, *14*(20). https://doi.org/10.3390/su142013611

Wohland, J., Witthaut, D., & Schleussner, C. F. (2018). Negative Emission Potential of Direct Air Capture Powered by Renewable Excess Electricity in Europe. *EARTHS FUTURE*, *6*(10), 1380–1384. https://doi.org/10.1029/2018EF000954

Yang, X., Nielsen, C. P., Song, S., & McElroy, M. B. (2022). Breaking the hard-to-abate bottleneck in China’s path to carbon neutrality with clean hydrogen. *Nature Energy*, *7*(10), 955–965. https://doi.org/10.1038/s41560-022-01114-6

Yumashev, D., Janes-Bassett, V., Redhead, J. W., Rowe, E. C., & Davies, J. (2022). Terrestrial carbon sequestration under future climate, nutrient and land use change and management scenarios: a national-scale UK case study. *ENVIRONMENTAL RESEARCH LETTERS*, *17*(11). https://doi.org/10.1088/1748-9326/aca037

Zhai, H. B., Gu, B. H., Zhu, K. W., & Huang, C. (2023). Feasibility analysis of achieving net-zero emissions in China?s power sector before 2050 based on ideal available pathways. *ENVIRONMENTAL IMPACT ASSESSMENT REVIEW*, *98*. https://doi.org/10.1016/j.eiar.2022.106948

Zhang, S.-C., Yang, X.-Y., Xu, W., & Fu, Y.-J. (2021). Contribution of nearly-zero energy buildings standards enforcement to achieve carbon neutral in urban area by 2060. *Advances in Climate Change Research*, *12*(5), 734–743. https://doi.org/10.1016/j.accre.2021.07.004

Zhang, Y., Davis, D., & Brear, M. J. (2022a). The role of hydrogen in decarbonizing a coupled energy system. *Journal of Cleaner Production*, *346*. https://doi.org/10.1016/j.jclepro.2022.131082

Zhang, L., Du, Q., Zhou, D., & Zhou, P. (2022b). How does the photovoltaic industry contribute to China’s carbon neutrality goal? Analysis of a system dynamics simulation. *Science of the Total Environment*, *808*. https://doi.org/10.1016/j.scitotenv.2021.151868

Zhang, S., Yi, B., Guo, F., & Zhu, P. (2022c). Exploring selected pathways to low and zero CO2 emissions in China’s iron and steel industry and their impacts on resources and energy. *Journal of Cleaner Production*, *340*. https://doi.org/10.1016/j.jclepro.2022.130813
